# Supplementary material for: Thiazolopyridines Improve Adipocyte Function by Inhibiting 11 Beta-HSD1 Oxoreductase Activity
Source: Hindawi journal article supplement (doi:10.1155/2017/3182129), 2017-01-01
Supplement: f1 [file 3182129.f1.doc]

**Supporting Information**

1. **Schematic synthesis of 2-amino-5-benzyl-4,5,6,7-tetrahydrothiazolo[5,4-c]pyridine (TR-01)**:

1. **Schematic synthesis of N-(5-benzyl)-4,5,6,7-tetrahydrothiazolo[5,4-c]pyridine-2-yl)-3-(4-chlorophenyl)-2-cyanoacrylamide (TR-02)**:

1. **Schematic synthesis of 2-amino-4,5,6,7-tetrahydrothiazolo[5,4-c]pyridine (TR-03)**:

1. **Schematic synthesis of 2-amino-5-methyl-4,5,6,7-tetrahydrothiazolo[5,4-c]pyridine (TR-04)**:
